# Supplementary material for: KDM4C contributes to cytarabine resistance in acute myeloid leukemia via regulating the miR-328-3p/CCND2 axis through MALAT1
Source: PubMed Central journal article supplement — Ther Adv Chronic Dis. 2021 Aug 8;12:2040622321997259. doi: 10.1177/2040622321997259 (PMC8358730; doi:10.1177/2040622321997259), 2021-08-08
Supplement: sj-pdf-1-taj-10.1177_2040622321997259.pdf [file sj-pdf-1-taj-10.1177_2040622321997259.pdf]

**Supplementary Table 1** Clinical characteristics of patients

| Clinical characteristics |        | cases (n = 30) |
|--------------------------|--------|----------------|
| gender                   | male   | 18             |
|                          | female | 12             |
| age (years)              | <50    | 13             |
|                          | ≥50    | 17             |
| FAB subtypes             | M1     | 3              |
|                          | M2     | 8              |
|                          | M3     | 1              |
|                          | M4     | 10             |
|                          | M5     | 5              |
|                          | M6     | 2              |
|                          | M7     | 1              |
| Hb (g/L)                 | <100   | 14             |
|                          | ≥100   | 16             |
| WBC ( $\times 10^9/L$ )  | <40    | 13             |
|                          | ≥40    | 17             |
| Plt ( $\times 10^9/L$ )  | <100   | 20             |
|                          | ≥100   | 10             |

**Supplementary Table 2.** Primer list for RT-qPCR

---

| Gene            | Gene ID | Sequence (5'-3')                                                               |
|-----------------|---------|--------------------------------------------------------------------------------|
| KDM4C           | 23081   | F: CGGTGCAAAAGAAATGCGTG<br>R: TTGTGTCCTTTCTGGGACAT                             |
| MALAT1          | 378938  | F: GATCAGGATTTGAGCGGAAG<br>R: ATAGACCCCTGACTTTCTGG                             |
| CCND2           | 894     | F: ATGCTGGAGGTCTGTGAGGA<br>R: GAACATGCAGACAGCACCCA                             |
| GAPDH           | 2597    | F: TTCGACAGTCAGCCGCATCTT<br>R: CCCAATACGACCAAATCCGTT                           |
| miR-328-3p      | 442901  | F: GTCGTATCCAGTGCGTGTTCGTGGAGTCGGCAATTGCACTGGATACGAC<br>R: CAGTGCGTGTTCGTGGAGT |
| U6              | 26827   | F: CTCGCTTCGGCAGCACA<br>R: AACGCTTCACGAATTTGCGT                                |
| MALAT1 promoter |         | F: TTCTGTAAAGGACTGGGGCC<br>R: AAGGACAGCTAAGATAGCAG                             |

---
